# Supplementary material
Source: bioRxiv or medRxiv preprint supplement (https://www.biorxiv.org/highwire/filestream/127058/field_highwire_adjunct_files/1/330639-2.pdf)
Supplement: Supplementary file [file 330639-2.pdf]

# Automated High-Throughput Light-Sheet Fluorescence Microscopy of Larval Zebrafish

Savannah L. Logan, Christopher Dudley, Ryan P. Baker, Michael J. Taormina, Edouard A. Hay, Raghuveer Parthasarathy

## Supplementary Information

### Contents

- Supplemental Figure Captions
- Supplemental Movie Captions
- Supplemental Table: Parts List

### Supplemental Figure Captions

**Supplemental Figure 1.** Sample brightfield images of four larval zebrafish, captured and saved prior to light sheet fluorescence imaging. Notably, the orientation is random in the capillary, with a tendency toward either “gut down” or “gut up.” Scale bar: 100  $\mu\text{m}$ .

**Supplemental Figure 2.** The number of neutrophils in 67 larval zebrafish, assessed from two-dimensional maximum intensity projections and from the full three-dimensional light sheet fluorescence scans. The former is  $0.76 \pm 0.02$  of the latter, indicating that three-dimensional imaging is necessary to capture all the cells in a three-dimensional volume.

## Supplemental Movie Captions

**Supplemental Movie 1.** Video of the automated, high-throughput light sheet microscope in operation. After a larval zebrafish, flowing through tubing, is detected and positioned, 3D scans in two colors in two different regions, are obtained. The final image (0:57-1:03) is of tdTomato-labeled bacteria and GFP-labeled neutrophils.

**Supplemental Movie 2.** A light sheet fluorescence scan through the anterior intestine of a larval zebrafish with GFP-expressing neutrophils evident as very bright objects above autofluorescent background. The total image depth is 475  $\mu\text{m}$  (2.5  $\mu\text{m}$ /slice x 190 slices). The maximum intensity projection of this scan is shown in Figure 2E.

|                                |  |  |  |  |  |  |  |  |
|--------------------------------|--|--|--|--|--|--|--|--|
|                                |  |  |  |  |  |  |  |  |
| Supplemental Table: Parts List |  |  |  |  |  |  |  |  |
|                                |  |  |  |  |  |  |  |  |

Automated High-Throughput Light-Sheet Fluorescence Microscopy of Larval Zebrafish

Savannah L. Logan, Christopher Dudley, Ryan P. Baker, Michael J. Taormina, Edouard A. Hay, Raghuveer Parthasarathy

|          |  |  |  |  |  |  |  |  |
|----------|--|--|--|--|--|--|--|--|
| March, 2 |  |  |  |  |  |  |  |  |
|----------|--|--|--|--|--|--|--|--|

| Label in                               | Part and Description                                                |  |  |  | Supplier / Manufacturer                                       |  | Part no.                    |  |
|----------------------------------------|---------------------------------------------------------------------|--|--|--|---------------------------------------------------------------|--|-----------------------------|--|
| Excitation Optics                      |                                                                     |  |  |  |                                                               |  |                             |  |
| 1                                      | Lasers: 458nm, 488nm, 561nm, 594nm; 20 mW                           |  |  |  | Coherent                                                      |  | Saphire                     |  |
|                                        | Fiber launch                                                        |  |  |  | Thorlabs base + custom objective mount + Siskiyou fiber mount |  |                             |  |
|                                        | Objective lens for fiber launch                                     |  |  |  | Zeiss                                                         |  | 5x plano-apochromat         |  |
| 2                                      | Acousto-optic tunable filter (AOTF)                                 |  |  |  | AA Opto-electronic                                            |  | AOTFnC-VIS-TN 1001 / 340697 |  |
|                                        | Fiber switch (fiber = Nufern S460 HP)                               |  |  |  | Leoni                                                         |  | eol 1x4                     |  |
| 3                                      | Cage Mount for galvanometer mirror, 30mm                            |  |  |  | Thorlabs                                                      |  | GCM001                      |  |
| 3                                      | Galvanometer mirror                                                 |  |  |  | Cambridge Technology                                          |  | 6210H                       |  |
| 4                                      | PrePrism-sample chamber objective                                   |  |  |  | Mitutoyo Plan APO 5X                                          |  | Z03154214                   |  |
|                                        |                                                                     |  |  |  |                                                               |  |                             |  |
| Hardware related to the sample chamber |                                                                     |  |  |  |                                                               |  |                             |  |
|                                        | Sample chamber: PA11 Black plastic, 3D printed                      |  |  |  | Protolabs                                                     |  | 3D printed                  |  |
|                                        | Alternate sample chamber (blue): E-Shell 3000 biocompatible plastic |  |  |  | Envisiontec.com                                               |  | 3D printed                  |  |
|                                        | Objective lens: Olympus 20x/0.5 Water Immersion Obj.                |  |  |  | Edmund Optics                                                 |  | 34556                       |  |
|                                        | O-rings,various                                                     |  |  |  | McMaster-Carr                                                 |  | various                     |  |
|                                        | Glass window, 20mm diameter, 2mm thick, VIS-NIR fused silica        |  |  |  | Edmund Optics                                                 |  | 49-642                      |  |
|                                        | Heater: flex heater, sheet of ~10                                   |  |  |  | Omega.com                                                     |  | KH-kit-efh-15001            |  |
| 5                                      | Prism, 20mm, N-BK-7 rt angle prism                                  |  |  |  | Edmund Optics                                                 |  | 32-334                      |  |
| 5                                      | Prism mount: mini-translation stage, one axis, linear               |  |  |  | ThorLabs                                                      |  | DT12                        |  |
| 5                                      | Prism holder                                                        |  |  |  | UO                                                            |  | custom                      |  |
| 5                                      | 45° mount                                                           |  |  |  | Edmund Optics                                                 |  | 59001                       |  |
| 5                                      | 1.5” straight mirror mount                                          |  |  |  | Edmund Optics                                                 |  | 33497                       |  |
| 5                                      | 1.0” straight mirror mount, mount only                              |  |  |  | Edmund Optics                                                 |  | 33-501                      |  |
|                                        | English long travel rack & pinion, camera adjustment                |  |  |  | Edmund Optics                                                 |  | 59-333                      |  |
|                                        | One knob stage                                                      |  |  |  | Edmund Optics                                                 |  | 59-331                      |  |
|                                        | Rail, 66mm square                                                   |  |  |  | ThorLabs                                                      |  | XT66                        |  |
|                                        | Rail, Dovetail                                                      |  |  |  | ThorLabs                                                      |  | XT66SP                      |  |
|                                        | Rail carriages                                                      |  |  |  | ThorLabs                                                      |  | XT66P2                      |  |
|                                        | 6mm rods for cage system/sample chamber holder                      |  |  |  | ThorLabs                                                      |  | ER-xx, various lengths      |  |
|                                        |                                                                     |  |  |  |                                                               |  |                             |  |
| Fluidics                               |                                                                     |  |  |  |                                                               |  |                             |  |
|                                        | Flow cell and holder                                                |  |  |  |                                                               |  |                             |  |
| 11c                                    | Flow cell: 3/16” dia. Clear acrylic rod                             |  |  |  | McMaster-Carr                                                 |  | UO Machine shop             |  |
| 11b                                    | Flow cell: 1/2” blunt stainless steel needle 18gauge                |  |  |  | McMaster-Carr                                                 |  | 75165A675                   |  |
| 11d                                    | Flow cell: Round glass capillary, 50mm, 0.7mm ID, 0.87mm ID         |  |  |  | Vitrocom Technical Glass                                      |  | cv7087-B                    |  |
|                                        | Flow cell: Square glass capillary, 50mm, 0.7mm ID, 0.140mm Wall     |  |  |  | Vitrocom Technical Glass                                      |  | 8270-050                    |  |
|                                        | Flow cell: Tub and Tile Silicon caulk                               |  |  |  | Hardware store                                                |  |                             |  |
| 11a                                    | Tubing, "Silastic," 0.74mm ID, Platinum cured                       |  |  |  | Fisher Scientific                                             |  | 11-189-15C                  |  |
|                                        | Luer lock plastic valve                                             |  |  |  |                                                               |  |                             |  |
| 9                                      | Syringe Pump, (BenchTop Style) 1/10 ml glass syringe                |  |  |  | KD scientific                                                 |  | 111                         |  |
|                                        | Metal Y tube, 0.05” 0.033” 1/4”                                     |  |  |  | ztubes.com                                                    |  | HSCY-18                     |  |
|                                        | Relay (for valves), 60 VDC/3.5A, 5Volt Logic                        |  |  |  | Grayhill                                                      |  | 70G-0DC5x16                 |  |
| 10                                     | 12V solenoid pinch valves (x6) 15PSI PN98302                        |  |  |  | Cole Parmer                                                   |  |                             |  |
| 10                                     | N.O. Pinch Valve, 0.75" dia., 0.030" ID-0.065" OD Tubing, 12 VDC    |  |  |  | Clippard                                                      |  | N PV1-1O-01-122             |  |

|                       |                                                                  |                                    |  |                             |
|-----------------------|------------------------------------------------------------------|------------------------------------|--|-----------------------------|
| <b>10</b>             | N.C. Pinch Valve, 0.75" dia., 0.030" ID-0.065" OD Tubing, 12 VDC | Clippard                           |  | NPV1-1C-01-122              |
| <b>10</b>             | N.C. Pinch Valve, 15psi 12V                                      | ColePalmer                         |  | 98302-02                    |
|                       |                                                                  |                                    |  |                             |
| <b>Other Hardware</b> |                                                                  |                                    |  |                             |
| <b>8</b>              | Hamamatsu Orca Flash 4.0 Camera                                  | Hamamatsu                          |  | C11440                      |
|                       | Firebird CL 2011 camera link board                               | Active Silicon                     |  | AS-FBD-1XCLED-2PE8          |
| <b>6</b>              | LED light (Bright field illumination)                            | ThorLabs                           |  | MCWHL5                      |
|                       | LED driver                                                       | ThorLabs                           |  | LEDD1B M00400850            |
|                       | Stage controller                                                 | Applied Scientific Instrumentation |  | TG-1000-16, TG16-XY:5A-Z:5U |
|                       | xyz stage                                                        | Applied Scientific Instrumentation |  | LS-5507,+?                  |
|                       | xyz arm, 8020, 1" x ~12" long aluminum channel                   | McMaster-Carr                      |  | 47065T101                   |
|                       | Data Acquisition (DAQ) Board                                     | National Instruments               |  | USB-6343 X-eries            |
